1 Light exposure decreases infectivity of the *Daphnia* parasite *Pasteuria ramosa*

2 Erin P. Overholt<sup>1</sup>, Meghan A. Duffy<sup>2</sup>, Matthew P. Meeks<sup>1</sup>, Taylor H. Leach<sup>1</sup>, Craig E. Williamson<sup>1</sup>

3 <sup>1</sup> Department of Biology, Miami University, Oxford, OH

4 <sup>2</sup> Department of Ecology and Evolutionary Biology, University of Michigan, Ann Arbor, MI

5 Email: [overhoep@miamioh.edu](mailto:overhoep@miamioh.edu), [duffymeg@umich.edu](mailto:duffymeg@umich.edu), [meeksm@umich.edu](mailto:meeksm@umich.edu),

6 [leachth@miamioh.edu](mailto:leachth@miamioh.edu), and [craig.williamson@miamioh.edu](mailto:craig.williamson@miamioh.edu)

7 KEYWORDS

8 zooplankton, UV, endospore, pathogen

9 ABSTRACT

10 Climate change is altering light regimes in lakes, which should impact disease outbreaks, since sunlight  
11 can harm aquatic pathogens. However, some bacterial endospores are resistant to damage from light,  
12 even surviving exposure to UV-C. We examined the sensitivity of *Pasteuria ramosa* endospores, an  
13 aquatic parasite infecting *Daphnia* zooplankton, to biologically relevant wavelengths of light.  
14 Laboratory exposure to increasing intensities of UV-B, UV-A, and visible light significantly decreased  
15 *P. ramosa* infectivity, though there was no effect of spore exposure on parasitic castration of the host.  
16 *P. ramosa* is more sensitive than its *Daphnia* host to damage by longer wavelength UV-A and visible  
17 light; this may enable *Daphnia* to seek an optimal light environment in the water column where both  
18 UV-B damage and parasitism are minimal. Studies of pathogen light sensitivity help us uncover  
19 factors controlling epidemics in lakes, which is especially important given that water transparency is  
20 decreasing in many lakes.

## 21 INTRODUCTION

22 Changing temperature and precipitation related to climate change are altering disease dynamics.  
23 One factor that plays a role is declining water transparency, since ultraviolet light penetration into lakes  
24 has germicidal effects (Williamson *et al.* 2017). Thus, by decreasing light penetration in lakes, climate  
25 change has the potential to promote epidemics.

26 However, while we know that many microbes are harmed by exposure to light, we also know  
27 some tolerate light remarkably well. Endospores, a resting stage found only in Gram positive bacteria  
28 of the group Firmicutes, are highly resistant to disinfecting techniques (Nicholson *et al.*, 2000),  
29 including high levels of UV-C radiation (Newcombe *et al.*, 2005). Surprisingly though, in the  
30 endospore form, the highly studied *Bacillus* showed decreased survival across a wide range of  
31 exposures, from UV-B to full sunlight (Xue and Nicholson, 1996). Other pathogens have shown a  
32 similar sensitivity to longer wavelengths of light. For example, an aquatic pathogen - the fungus  
33 *Metschnikowia* - was sensitive to solar radiation even in the absence of UV, and field surveys showed  
34 larger epidemics in less transparent lakes (Overholt *et al.*, 2012).

35 Light can harm pathogens, and climate change is altering light regimes in lakes. Thus,  
36 investigations into how aquatic pathogens and their hosts respond to light are needed to better  
37 understand and predict disease dynamics. Here we test whether endospores of the virulent bacterial  
38 pathogen *Pasteuria ramosa* are sensitive to biologically relevant wavelengths of light, and if light  
39 exposure decreases its ability to lower fecundity in infected *Daphnia* hosts.

## 40 METHODS

41 We exposed *P. ramosa* to different environmentally realistic light conditions in the laboratory  
42 and measured subsequent pathogen infectivity and host reproduction in *Daphnia dentifera*. Shallow  
43 quartz dishes containing 25 mL aliquots of *P. ramosa* spores (2000 spores mL<sup>-1</sup>) were placed on a  
44 rotating wheel (2 rpm) for 12 h at 24°C in a UV-lamp phototron and exposed to different levels of  
45 biologically relevant UV-B, and photorepair radiation (PRR, comprised of UV-A and visible light),  
46 which stimulates repair of UV-damaged DNA (Williamson *et al.*, 2001). In experiment 1, we  
47 examined the infectivity of *P. ramosa* under 10 intensities of PRR (8 replicates per treatment).  
48 Experiment 2 used a two-way factorial design to measure the effects of light wavelength and intensity  
49 on pathogen infectivity and host fecundity. Spores were exposed to either UVB and PRR or visible  
50 light only at nine intensity levels. For the exposure, spores (2000 spores mL<sup>-1</sup>) were aliquoted into five  
51 replicates of each treatment (intensity x light type). (See supplement for additional details.)

52           Following exposure in the phototron, dishes were removed and a single, week-old *D. dentifera*  
53           neonate was placed in each dish with the exposed *P. ramosa* spores. After three days, *D. dentifera*  
54           were transferred to 50 mL beakers and filled with 30 mL of spore-less, filtered lake water. In both  
55           experiments, offspring were removed during water changes. In experiment 2, neonates were quantified  
56           during water changes and eggs in the brood chamber counted on day 25. After 25 days, individuals  
57           were examined for infection.

58           We used a binomial logistic regression model to test the effects of increasing light intensity on  
59           infectivity for each light treatment. A two-way ANOVA was used to test the effect of light treatment  
60           and intensity on the number of neonates produced. Analyses were conducted using R version 3.4.4 (R  
61           Core Development Team).

## 62           RESULTS

63           Light exposure greatly decreased parasite infectivity: In both experiments, the highest rates of  
64           infection were in the dark (0% light) and decreased with increasing light exposure of the pathogen (Fig.  
65           1). The fecundity of *Daphnia* also increased with increasing exposure of *P. ramosa* to light, but, for  
66           hosts that became infected, there was no difference in the number of neonates produced (Fig. 2).

## 67           DISCUSSION

68           We found that endospores of *P. ramosa* are surprisingly susceptible to longer wavelength UV-  
69           B, UV-A and even visible light. This influence of light on spores benefitted *Daphnia* via impacts on  
70           infection: hosts that were exposed to spores that had been exposed to more light were less likely to  
71           become infected and, therefore, produced more offspring. However, when just infected hosts were  
72           considered, spore light exposure did not alter host reproduction.

73           Other aquatic pathogens are sensitive to longer wavelengths of light as well. For example,  
74           *Cryptosporidium* cysts lost infectivity following exposure to UV (Connelly *et al.*, 2007; King *et al.*,  
75           2008) and visible light (Connelly *et al.*, 2007). Natural sunlight caused additional sublethal effects on  
76           the protein secretion required by *Cryptosporidium* for attachment to its host (King *et al.*, 2010). The  
77           fungal parasite *Metschnikowia*, which can be found in the same lake systems as *P. ramosa*, was also  
78           sensitive to both short wavelength UV-B as well as longer wavelength UV-A and visible light in both  
79           laboratory and field studies (Overholt *et al.*, 2012). Another field study suggested that *Pasteuria* was  
80           susceptible to solar radiation; however sensitivity to visible light was not specifically tested (C. L.  
81           Shaw, unpublished data).

82 In our study, *P. ramosa* exhibited decreased infectivity even under long wavelength UV-A and  
83 visible light, in the absence of UV-B, though shorter wavelengths overall caused the greatest decrease  
84 in infectivity. In contrast, these longer wavelengths benefit the host, *Daphnia*, by stimulating  
85 photorepair of DNA damage (Sancar, 1994). Since the same wavelengths that damage the pathogen  
86 can benefit the host, *Daphnia* may be able to find a refuge from disease and damaging UV-B at  
87 intermediate depths in the water column where UV-A and visible light levels are high, but damaging  
88 UV-B is less intense.

## 89 CONCLUSIONS

90 Lakes in many regions are experiencing lower intensity light regimes due to increased dissolved  
91 organic matter inputs and/or eutrophication (Monteith *et al.*, 2007; Solomon *et al.*, 2015; Strock *et al.*,  
92 2017; Williamson *et al.*, 2017; Williamson *et al.*, 2015). Our finding that the common bacterial  
93 pathogen *P. ramosa* is sensitive to both UV and visible light suggests that decreases in lake  
94 transparency through “browning” and/or “greening,” may allow for increased *P. ramosa* prevalence.

95

## 96 SUPPLEMENTARY DATA

97 Supplementary data will be available online after publication.

98

## 99 ACKNOWLEDGMENTS

100 We thank Rebecca Healy for preliminary *Pasteuria* work.

101

## 102 FUNDING

103 This work was supported by the US National Science Foundation [grant number NSF-DEB 1305836 to  
104 M.A.D.] and Miami University.

105 REFERENCES

- 106 Connelly, S. J., Wolyniak, E. A., Williamson, C. E. and Jellison, K. L. (2007) Artificial UV-B and  
107 solar radiation reduce in vitro infectivity of the human pathogen *Cryptosporidium parvum*.  
108 *Environ. Sci. Technol.*, **41**, 7101-7106.
- 109 King, B. J., Hoefel, D., Daminato, D. P., Fanok, S. and Monis, P. T. (2008) Solar UV reduces  
110 *Cryptosporidium parvum* oocyst infectivity in environmental waters. *J. Appl. Microbiol.*, **104**,  
111 1311-1323.
- 112 King, B. J., Hoefel, D., Wong, P. E. and Monis, P. T. (2010) Solar radiation induces non-nuclear  
113 perturbations and a false start to regulated exocytosis in *Cryptosporidium parvum*. *Plos One*, **5**.
- 114 Monteith, D. T., Stoddard, J. L., Evans, C. D., De Wit, H. A., Forsius, M., Høgåsen, T., Wilander, A.,  
115 Skjelkvåle, B. L., Jeffries, D. S., Vuorenmaa, J., Keller, B., Kopáček, J. and Vesely, J. (2007)  
116 Dissolved organic carbon trends resulting from changes in atmospheric deposition chemistry.  
117 *Nature*, **450**, 537-541.
- 118 Newcombe, D. A., Schuerger, A. C., Benardini, J. N., Dickinson, D., Tanner, R. and Venkateswaran,  
119 K. (2005) Survival of spacecraft-associated microorganisms under simulated martian UV  
120 irradiation. **71**, 8147-8156.
- 121 Nicholson, W. L., Munakata, N., Horneck, G., Melosh, H. J. and Setlow, P. (2000) Resistance of  
122 *Bacillus* endospores to extreme terrestrial and extraterrestrial environments. *Microbiol. Mol.*  
123 *Biol. Rev.*, **64**, 548-572.
- 124 Overholt, E. P., Hall, S. H., Williamson, C. E., Meikle, C. K., Duffy, M. A. and Cáceres, C. E. (2012)  
125 Solar radiation decreases parasitism in *Daphnia*. *Ecol. Lett.*, **15**, 47-54.
- 126 Sancar, A. (1994) Mechanisms of DNA Excision-Repair. *Science*, **266**, 1954-1956.
- 127 Solomon, C. T., Jones, S. E., Weidel, B. C., Buffam, I., Fork, M. L., Karlsson, J., Larsen, S., Lennon, J.  
128 T., Read, J. S., Sadro, S. and Saros, J. E. (2015) Ecosystem consequences of changing inputs of  
129 terrestrial dissolved organic matter to lakes: Current knowledge and future challenges.  
130 *Ecosystems*, **18**, 376-389.
- 131 Strock, K. E., Theodore, N., Gawley, W. G., Ellsworth, A. C. and Saros, J. E. (2017) Increasing  
132 dissolved organic carbon concentrations in northern boreal lakes: Implications for lake water  
133 transparency and thermal structure. *J. Geophys. Res.: Biogeosci.*, **122**, 1022-1035.
- 134 Williamson, C. E., Madronich, S., Lal, A., Zepp, R. E., Lucas, R. M., Overholt, E. P., Rose, K. C.,  
135 Schladow, G. and Lee-Taylor, J. (2017) Climate change-induced increases in precipitation are

- 136           reducing the potential for solar ultraviolet radiation to inactivate pathogens in surface waters.  
137           *Sci. Rep.*, **7**.
- 138   Williamson, C. E., Neale, P. J., Grad, G., De Lange, H. J. and Hargreaves, B. R. (2001) Beneficial and  
139           detrimental effects of UV on aquatic organisms: Implications of spectral variation. *Ecol. Appl.*,  
140           **11**, 1843-1857.
- 141   Williamson, C. E., Overholt, E. P., Pilla, R. M., Leach, T. H., Brentrup, J. A., Knoll, L. B., Mette, E.  
142           M. and Moeller, R. E. (2015) Ecological consequences of long-term browning in lakes. *Sci.*  
143           *Rep.*, **5**, 18666.
- 144   Xue, Y. M. and Nicholson, W. L. (1996) The two major spore DNA repair pathways, nucleotide  
145           excision repair and spore photoproduct lyase, are sufficient for the resistance of *Bacillus subtilis*  
146           spores to artificial UV-C and UV-B but not to solar radiation. *Appl. Environ. Microbiol.*, **62**,  
147           2221-2227.

148 Fig. 1. Proportion of *Daphnia* infected at each exposure level of the pathogen to visible light,  
149 photorepair radiation, or UV-B + photorepair. Lines represent the fitted logistic regression model for  
150 the visible light and photorepair radiation treatments. When UV was blocked, the proportion of *D.*  
151 *dentifera* infected significantly decreased with increasing exposure of the pathogen (experiment 2  
152 Visible Light,  $p < 0.01$ ); the logistic model fit indicated that there was an 8.0% decreased probability of  
153 infection for every 1% increase in light exposure. We also found a significant negative relationship  
154 between light intensity and infectivity when the pathogen was exposed to increasing levels of  
155 photorepair radiation (experiment 1 Photorepair Radiation,  $p < 0.01$ ); the logistic model indicated that  
156 for every 1% increase in PRR exposure the probability of *D. dentifera* infection decreased by 6.5%.  
157 When exposed to the full spectrum of light (experiment 2 UV-B + Photorepair), there was also a  
158 decline in infectivity; this model would not converge due to sharp cut off in proportion infected, so the  
159 line does not represent the fitted model, but instead simply connects the points.

160 Fig. 2: Fecundity (total neonates plus eggs on day 25) of infected (triangles) and uninfected (circles)  
161 *Daphnia* in experiment 2. Overall, *Daphnia* fecundity increased when spores were exposed to higher  
162 intensities (intensity  $p < 0.001$ , light treatment  $p = 0.03$ ), but, for hosts that became infected, there was  
163 no difference in the number of neonates produced in the different treatments (intensity  $p = 0.37$ ; light  
164 treatment  $p = 0.57$ ). The lines represent linear regressions with shared 95% confidence intervals for  
165 infected and uninfected individuals.



## SUPPLEMENTAL METHODS

*D. dentifera* were isolated from Bishop Lake (Livingston County, MI, USA) and maintained on a diet of *Ankistrodesmus falcatus* at 24°C on a 16:8 light: dark cycle throughout the experiment. A single clone of the host species was used to standardize the susceptibility of the host organism to the bacterial *P. ramosa* strains.

PRR was supplied by two 40-W UV-A bulbs (Q-Lab QUV UV-A, Q-Lab, Cleveland, OH) and two fluorescent, 40 W, cool white tube bulbs. Light intensity was manipulated using mesh screens as neutral density filters. A total of ten intensity treatments, with eight replicates each, were used in experiment 1 (0%, 2.6%, 5%, 9.2%, 23%, 31%, 40%, 57%, 77%, 100%).

In experiment 2, PRR and UV-B were crossed factorially. Covering the UV-B lamp (Spectronics XX15B, Rochester, New York) with acetate removed wavelengths less than 295 nm, allowing only biologically relevant wavelengths to be transmitted. The addition of light filters on individual dishes either transmitted UV (creating the “UV-B + photorepair” treatment) or blocked all UV (creating the “visible light” treatment). In the UV-B + photorepair treatment, a plastic filter (printed acetate, transmitting 91% photosynthetically active radiation (PAR) 400–700 nm, 87% UV-A 320–399 nm, and 70% UV-B 295–319 nm, in air) allowed full-spectrum exposure while keeping the starting intensity between UV-B + photorepair and visible light treatments similar. In the visible light treatment, Courtgard (CP Films, Inc., Martinsville, VA, USA) transmitted visible light, but blocked most UV (in air, transmits 87% of 400–700 nm PAR, 0% UV-B 295–319 nm and 6% of UV-A 320–399 nm). Similar to experiment 1, mesh screens acting as neutral density filters were again used to create nine intensity levels (0%, 2.6%, 5%, 9.2%, 13%, 23%, 31%, 57%, 100%).

When *D. dentifera* were exposed to spores, all dishes were placed in an incubator at 24°C on a 16:8 light (cool white bulbs): dark cycle. Individual *D. dentifera* were fed *A. falcatus* ( $1 \times 10^3$  cells mL<sup>-1</sup>) daily for three days. After three days, individuals were moved to clean, spore-free water. Individuals were then fed daily, and the water was changed every three days.

Proportion Daphnia Infected

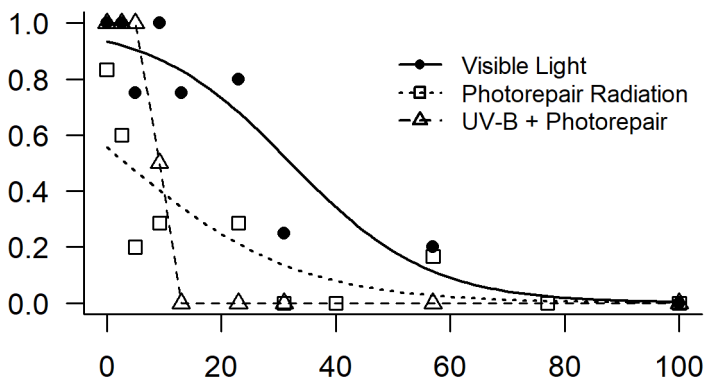

Percent Light Exposure of Parasite

UV-B+Photorepair

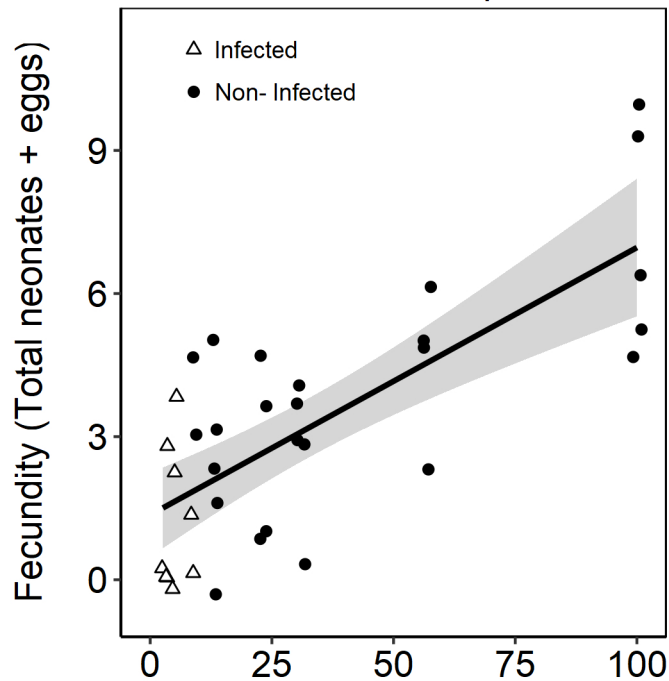

Visible Light

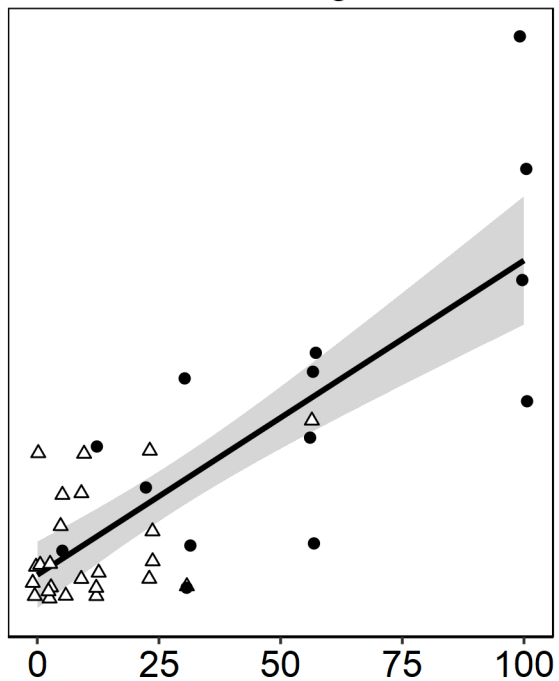

Source: https://www.biorxiv.org/content/10.1101/789628v1.full.pdf
